# Supplementary material for: Sequencing mRNA from Cryo-Sliced Drosophila Embryos to Determine Genome-Wide Spatial Patterns of Gene Expression
Source: PubMed Central journal article supplement (PMC3741199; doi:10.1371/journal.pone.0071820), 2013-08-12
Supplement: pone.0071820.s001.pdf [file pone.0071820.s001.pdf]

## 60 $\mu$ m Replicate 1

1 2 3 4 5 6

$r = 0.915$   $r = 0.907$   $r = 0.905$   $r = 0.906$   $r = 0.9$

1

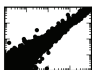

$r = 0.954$   $r = 0.95$   $r = 0.95$   $r = 0.921$

2

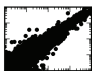

$r = 0.962$   $r = 0.959$   $r = 0.919$

3

$r = 0.961$   $r = 0.917$

4

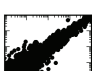

$r = 0.928$

5

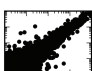

6

## 60 $\mu$ m Replicate 2

1 2 3 4 5 6

$r = 0.945$   $r = 0.934$   $r = 0.93$   $r = 0.933$   $r = 0.928$

1

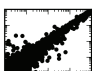

$r = 0.959$   $r = 0.956$   $r = 0.954$   $r = 0.95$

2

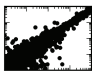

$r = 0.965$   $r = 0.958$   $r = 0.954$

3

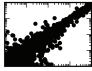

$r = 0.962$   $r = 0.957$

4

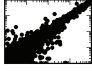

$r = 0.957$

5

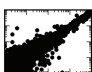

6

## 60 $\mu$ m Replicate 3

1 2 3 4 5 6

$r = 0.949$   $r = 0.951$   $r = 0.95$   $r = 0.939$   $r = 0.93$

1

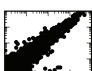

$r = 0.949$   $r = 0.947$   $r = 0.939$   $r = 0.928$

2

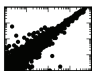

$r = 0.962$   $r = 0.939$   $r = 0.929$

3

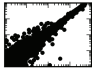

$r = 0.947$   $r = 0.936$

4

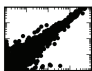

$r = 0.944$

5

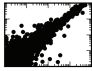

6
